# Supplementary material
Source: PubMed Central journal article supplement (PMC1413827)

## PA14 Parental Transposon Insertion Library Production Flow Chart

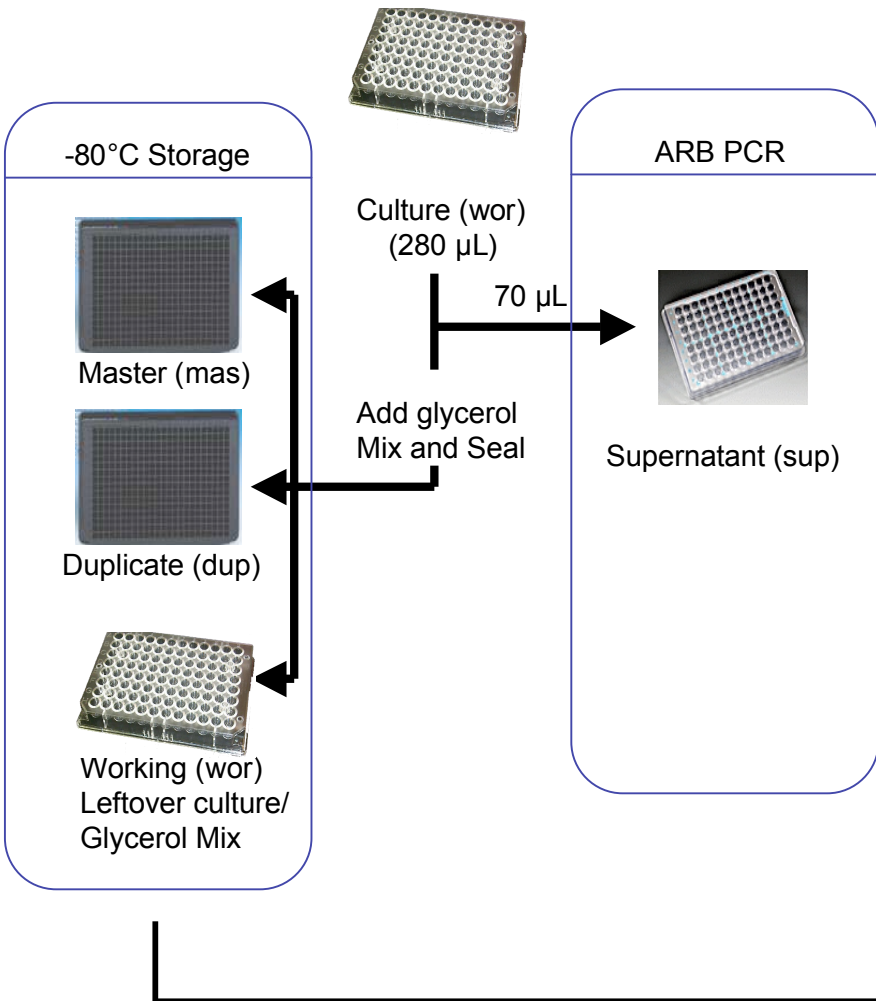

## PA14NR Set Production Flow Chart

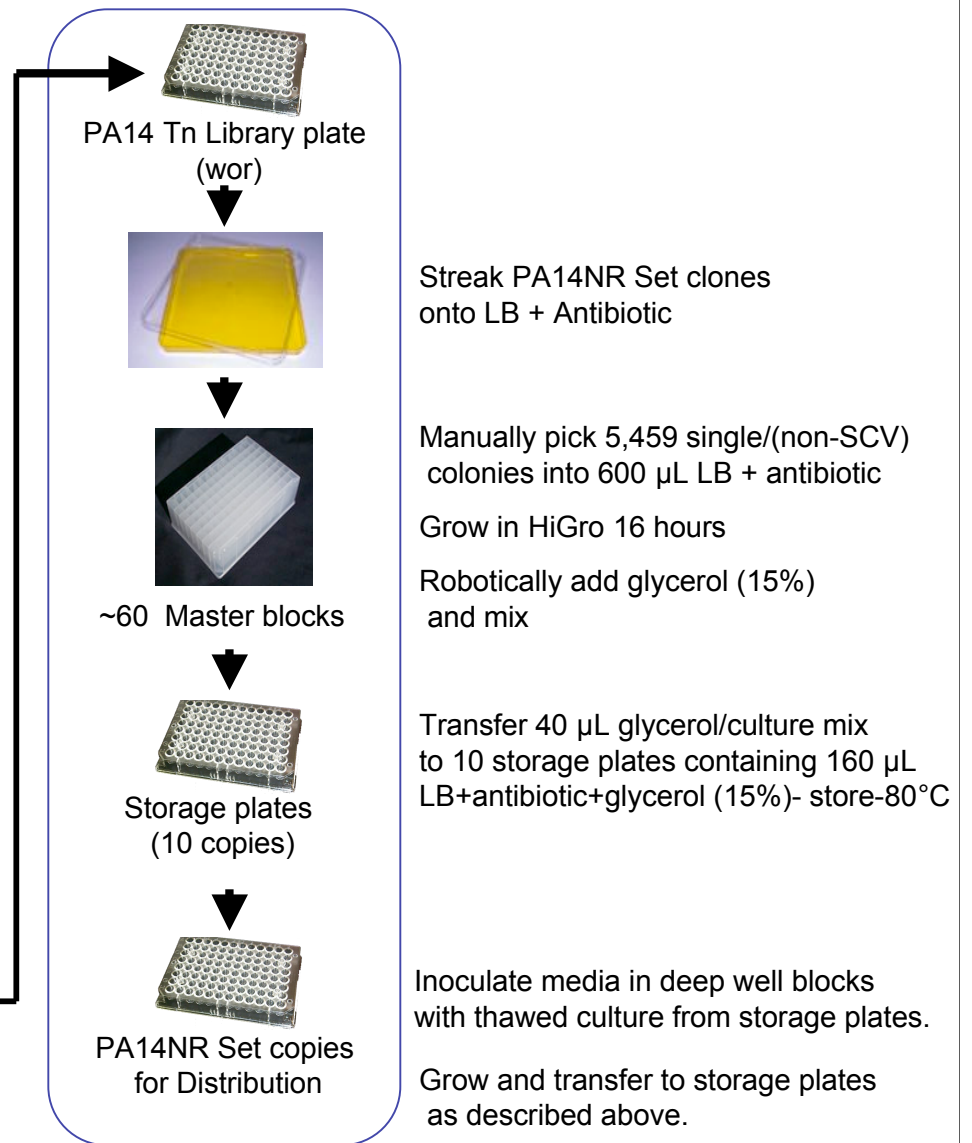

Supplement: pnas_0511100103_2.pdf [file pnas_0511100103_2.pdf]
