# Supplementary material
Source: PubMed Central journal article supplement (PMC1413827)

**A**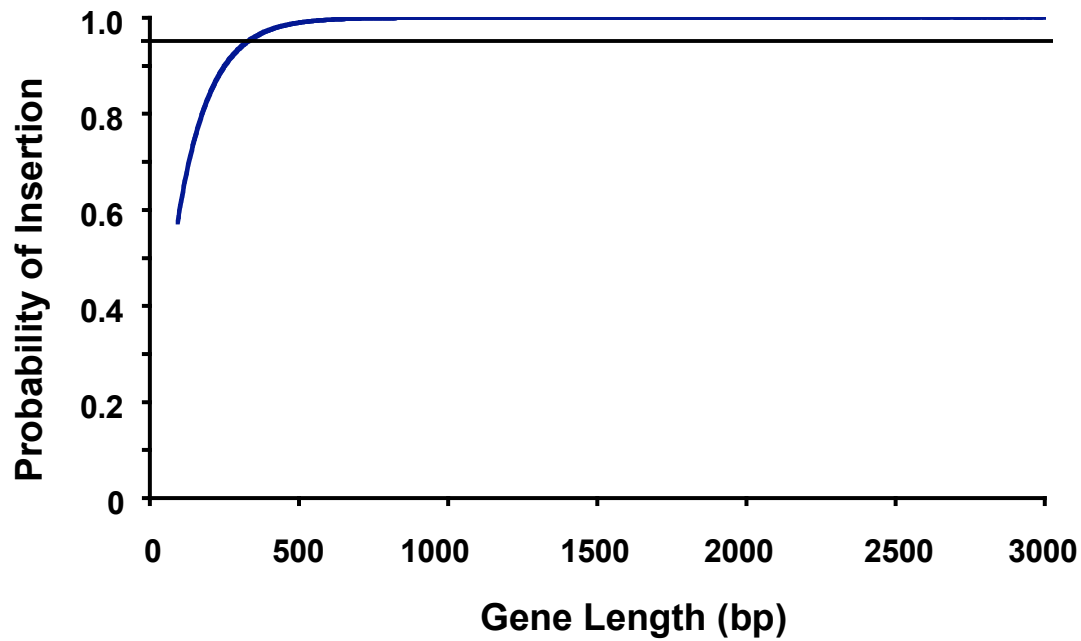**B**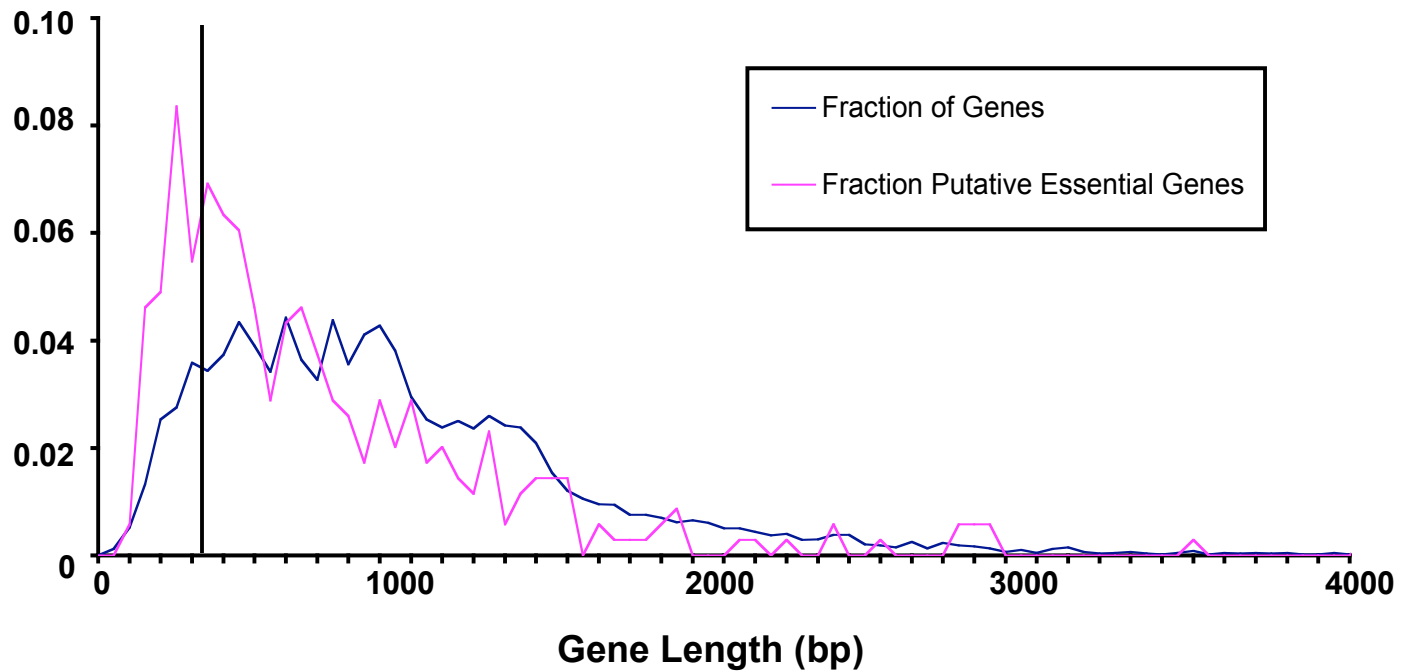

Supplement: pnas_0511100103_1.pdf [file pnas_0511100103_1.pdf]
